# Supplementary material for: A cross-sectional study exploring the relationship between symptoms of anxiety/depression and P50 sensory gating in adult patients diagnosed with chronic fatigue syndrome/myalgic encephalomyelitis
Source: Frontiers journal article supplement (doi:10.3389/fnins.2023.1286340), 2024-01-05
Supplement: Table_1.DOCX [file Table_1.DOCX]

| *Individual characteristics* | *n* | *%* |
| --- | --- | --- |
| Gender |  |  |
| male | 109 | 43.8 |
| female | 140 | 56.2 |
| Age |  |  |
| ≤30 | 58 | 23.3 |
| 31-40 | 54 | 21.7 |
| 41-50 | 37 | 14.9 |
| ≥50 | 100 | 40.2 |
| Educational level |  |  |
| Illiteracy | 2 | 0.8 |
| Primary school | 8 | 3.2 |
| Junior high school | 32 | 12.8 |
| Senior high school | 36 | 14.5 |
| Junior college | 42 | 16.9 |
| Undergraduate course | 93 | 37.3 |
| Postgraduate course | 34 | 13.7 |
| Doctor's degree or above | 2 | 0.8 |
| SCL-90 |  |  |
| 0-160 | 173 | 69.5 |
| 161-200 | 29 | 11.6 |
| 201-249 | 27 | 10.8 |
| >250 | 20 | 8.0 |
| HAMD |  |  |
| 0-7 | 52 | 20.9 |
| 8-20 | 83 | 33.3 |
| 21-34 | 88 | 35.3 |
| >35 | 26 | 10.4 |
| HAMA |  |  |
| 0-7 | 48 | 19.3 |
| 8-14 | 60 | 24.1 |
| 15-20 | 61 | 24.5 |
| 21-28 | 52 | 20.9 |
| >29 | 28 | 11.2 |
| P50 SG ratio |  |  |
| ≤50 | 108 | 43.4 |
| >50 | 141 | 56.6 |
