# Supplementary material for: A cross-sectional study exploring the relationship between symptoms of anxiety/depression and P50 sensory gating in adult patients diagnosed with chronic fatigue syndrome/myalgic encephalomyelitis
Source: Frontiers journal article supplement (doi:10.3389/fnins.2023.1286340), 2024-01-05
Supplement: Table_2.DOCX [file Table_2.DOCX]

| The K-W test | Total=249 | N(%) | degrees of freedom | *P* Value |
| --- | --- | --- | --- | --- |
| Age | the youth | 58(23.3) | 3 | 0.764 |
|  | young and middle-aged | 54(21.7) |  |  |
|  | the middle-aged | 37(14.9) |  |  |
|  | the middle-aged and elderly | 100(40.2) |  |  |
| Gender | male | 109(43.8) | 1 | 0.079 |
|  | female | 140(56.2) |  |  |
| Anxiety(HAMA) | no anxiety | 48(19.3) | 4 | *0.032* |
|  | may have anxiety | 60(24.1) |  |  |
|  | there must be anxiety | 61(24.5) |  |  |
|  | there must be obvious anxiety | 52(20.9) |  |  |
|  | may be severe anxiety | 28(11.2) |  |  |
| Depression(HAMD) | no depression | 52(20.9) | 3 | 0.055 |
|  | maybe mild depression | 83{33.3) |  |  |
|  | must be depressed. | 88(35.3） |  |  |
|  | severe depression | 26(10.4) |  |  |
| SCL-90 | no problem | 173(69.5) | 3 | 0.353 |
|  | further tests should be done | 29(11.6) |  |  |
|  | obvious psychological poblems | 27(10.8) |  |  |
|  | serious psychological problems | 20(8.0) |  |  |
| Anxiety/depression(divided by 7) | no anxiety and depression | 43(17.3) | 3 | 0.092 |
|  | only anxiety | 9(3.6) |  |  |
|  | only depression | 9(3.6) |  |  |
|  | anxiety with depression | 188(75.5) |  |  |
| Anxiety/depression(divided by 14/20) | no anxiety and depression | 108(43.4) | 3 | *0.024* |
|  | only anxiety | 31(12.4) |  |  |
|  | only depression | 13(5.2) |  |  |
|  | *anxiety with depression* | 97(39.0) |  |  |
