# Supplementary material for: A cross-sectional study exploring the relationship between symptoms of anxiety/depression and P50 sensory gating in adult patients diagnosed with chronic fatigue syndrome/myalgic encephalomyelitis
Source: Frontiers journal article supplement (doi:10.3389/fnins.2023.1286340), 2024-01-05
Supplement: Table_3.DOCX [file Table_3.DOCX]

| **Pairwise comparison for the P50 SG ratio of anxiety degree groups** | | | | |  |
| --- | --- | --- | --- | --- | --- |
| Sample 1-Sample 2 | Test statistics | Standard error | Standard test statistics | *Significance* | *Adj.Significance a* |
| NA-MHA | -16.796 | 13.946 | -1.204 | 0.228 | 1.000 |
| NA-TMBA | -16.973 | 13.895 | -1.222 | 0.222 | 1.000 |
| NA-MBSA | -32.926 | 17.126 | -1.923 | 0.055 | 0.545 |
| NA-TMBOA | -44.037 | 14.415 | -3.055 | 0.002 | *0.023* |
| MHA-TMBA | -0.177 | 13.094 | -0.014 | 0.989 | 1.000 |
| MHA-MBSA | -16.130 | 16.483 | -0.979 | 0.328 | 1.000 |
| MHA-TMBOA | -27.241 | 13.645 | -1.996 | 0.046 | 0.459 |
| TMBA-MBSA | -15.953 | 16.439 | -0.970 | 0.332 | 1.000 |
| TMBA-TMBOA | -27.064 | 13.593 | -1.991 | 0.046 | 0.465 |
| MBSA-TMBOA | 11.111 | 16.881 | 0.658 | 0.510 | 1.000 |
| NA**-**No anxiety MHA-May have anxiety TMBA-There must be anxiety  MBSA-May be severe anxiety TMBOA-There must be obvious anxiety | | | | | |
| Each row tests the null hypothesis that sample 1 and sample 2 have the same distribution.  Progressive significance was shown (two-sided test). The significance level was.05.  a Significance values have been adjusted by Bonferroni correction for a number of tests. | | | | | |
