# Supplementary material for: A cross-sectional study exploring the relationship between symptoms of anxiety/depression and P50 sensory gating in adult patients diagnosed with chronic fatigue syndrome/myalgic encephalomyelitis
Source: Frontiers journal article supplement (doi:10.3389/fnins.2023.1286340), 2024-01-05
Supplement: Table_4.DOCX [file Table_4.DOCX]

| **Pairwise comparison for the P50 SG ratio of anxiety and depression groups** | | | | | |
| --- | --- | --- | --- | --- | --- |
| Sample 1-Sample 2 | Test statistics | Standard error | Standard test statistics | *Significance* | *Adj.Significance a* |
| NAOD-OD | -16.220 | 14.674 | -1.105 | 0.269 | 1.000 |
| NAOD-AAD | -29.949 | 10.074 | -2.973 | 0.003 | *0.018* |
| NAOD-OA | -30.307 | 21.142 | -1.433 | 0.152 | 0.910 |
| OD-AND | -13.729 | 14.859 | -0.924 | 0.356 | 1.000 |
| OD-OA | -14.087 | 23.796 | 0.423 | 0.554 | 1.000 |
| AAD-OA | 0.358 | 21.270 | 0.335 | 0.987 | 1.000 |
| NAOD-No anxiety or depression OA-Only anxiety OD-Only depression AAD-Anxiety and depression | | | | | |
| Each row tests the null hypothesis that sample 1 and sample 2 have the same distribution  Progressive significance was shown (two-sided test). The significance level was.05.  a Significance values have been adjusted by Bonferroni correction for a number of tests. | | | | | |
