# Supplementary material for: A cross-sectional study exploring the relationship between symptoms of anxiety/depression and P50 sensory gating in adult patients diagnosed with chronic fatigue syndrome/myalgic encephalomyelitis
Source: Frontiers journal article supplement (doi:10.3389/fnins.2023.1286340), 2024-01-05
Supplement: Table_5.DOCX [file Table_5.DOCX]

Table 5. The correlation analysis results of P50 value and various variables

| Spearman nonparametric test |  |  | Total（N=249） | P50 normal (N=108) | P50 abnormal (N=141) | AAD delimited by 7(N=188) | NAOD on delimited by 14/20(N=108) | OD delimited by 14/20(N=13) | AAD delimited by 14/20(N=97) |
| --- | --- | --- | --- | --- | --- | --- | --- | --- | --- |
|  | Somatic symptoms | Sig. (Double tail) | ***0.012**** |  |  |  | ***0.022**** |  |  |
|  | Psychological symptoms | Sig. (Double tail) | ***0.003***** |  |  | ***0.035**** | ***0.023**** |  | ***0.030**** |
|  | HAMA total points | Sig. (Double tail) | ***0.002***** |  |  | ***0.025**** | ***0.013**** |  | ***0.040**** |
|  | Anxiety/somatization | Sig. (Double tail) | ***0.002***** |  |  | ***0.004***** |  | ***0.048**** | ***0.016**** |
|  | Weight | Sig. (Double tail) |  | ***0.033**** |  |  |  |  |  |
|  | Cognitive impairment | Sig. (Double tail) |  |  |  | ***0.003***** | ***0.009***** |  | ***0.006***** |
|  | Day and night change | Sig. (Double tail) |  |  | ***0.032**** |  |  |  | ***0.038**** |
|  | Blockage | Sig. (Double tail) |  |  | ***0.039**** | ***0.002***** | ***0.017**** |  | ***0.003***** |
|  | Sense of Despair | Sig. (Double tail) | ***0.001***** |  |  | ***0.002***** | ***0.044**** |  | ***0.013**** |
|  | HAMD total points | Sig. (Double tail) | ***0.001***** |  |  | ***0.001***** |  |  | ***0.003***** |
|  | Interpersonal sensitivity | Sig. (Double tail) |  |  |  |  |  | ***0.038**** |  |
|  | Depression | Sig. (Double tail) |  |  |  |  |  | ***0.036**** |  |
|  | Hostility | Sig. (Double tail) | ***0.018**** |  |  |  |  | ***0.048**** |  |
|  | Paranoid ideation | Sig. (Double tail) | ***0.019**** |  |  |  |  |  |  |
| NAOD-No anxiety or depression OA-Only anxiety OD-Only depression AAD-Anxiety and depression | | | | | | | | | |
| * At level 0.05 (two-tailed), the correlation was significant. | | | | | | | | | |
| ** At level 0.01 (two-tailed), the correlation was significant. | | | | | | | | | |
