# Supplementary material for: A cross-sectional study exploring the relationship between symptoms of anxiety/depression and P50 sensory gating in adult patients diagnosed with chronic fatigue syndrome/myalgic encephalomyelitis
Source: Frontiers journal article supplement (doi:10.3389/fnins.2023.1286340), 2024-01-05
Supplement: Table_6.DOCX [file Table_6.DOCX]

| Variable in the equation | | | | | | | | | |
| --- | --- | --- | --- | --- | --- | --- | --- | --- | --- |
|  |  | B | Standard error | Wald | Degree of freedom | Significance | Exp(B) | 95% confidence interval for EXP(B) |  |
|  |  |  |  |  |  |  |  | The upper limit | The floor limit |
| Step 1a | NAOD |  |  | 8.155 | 3 | 0.043 |  |  |  |
|  | OA | -0.802 | .287 | 7.793 | 1 | *0.005* | .448 | .255 | .787 |
|  | OD | -0.552 | .418 | 1.748 | 1 | 0.186 | .576 | .254 | 1.305 |
|  | AAD | -0.147 | .609 | .058 | 1 | 0.809 | .863 | .262 | 2.846 |
|  | Constant | .617 | .213 | 8.400 | 1 | *0.004* | 1.853 |  |  |
| NAOD-No anxiety or depression OA-Only anxiety OD-Only depression AAD-Anxiety and depression | | | | | | | | | |
| a Variables entered in Step 1: anxiety and depression group. | | | | | | | | | |
