# Supplementary material for: A cross-sectional study exploring the relationship between symptoms of anxiety/depression and P50 sensory gating in adult patients diagnosed with chronic fatigue syndrome/myalgic encephalomyelitis
Source: Frontiers journal article supplement (doi:10.3389/fnins.2023.1286340), 2024-01-05
Supplement: Table_7.DOCX [file Table_7.DOCX]

Attached Table . The correlation analysis results of P50 value and various variables

| **Correlation analysis** | | | | | | | | | | | | | |
| --- | --- | --- | --- | --- | --- | --- | --- | --- | --- | --- | --- | --- | --- |
| Spearman nonparametric test |  |  | Total（N=249） | P50 normal (N=108) | P50 abnormal (N=141) | NAOD delimited by7 (N=43) | OA delimited by 7(N=9) | OD delimited by 7(N=9) | AAD delimited by 7(N=188) | NAOD on delimited by 14/20(N=108) | OA delimited by 14/20(N=31) | OD delimited by 14/20(N=13) | AAD delimited by 14/20(N=97) |
|  | S2/S1 | Correlation coefficient | 1 | 1 | 1 | 1 | 1 | 1 | 1 | 1 | 1 | 1 | 1 |
|  |  | Sig. (Double tail) | . | . | . | . | . | . | . | . | . | . | . |
|  | Somatic symptoms | Correlation coefficient | .158 | 0.119 | 0.014 | 0.022 | -0.067 | -0.1 | 0.128 | .220 | -1.173 | 0.537 | 0.164 |
|  |  | Sig. (Double tail) | ***0.012**** | 0.22 | 0.869 | 0.887 | 0.865 | 0.798 | 0.08 | ***0.022**** | 0.352 | 0.059 | 0.108 |
|  | Psychological symptoms | Correlation coefficient | .187 | 0.132 | 0.073 | -0.044 | -0.017 | 0.115 | .154 | 0.218 | -0.187 | 0.247 | .220 |
|  |  | Sig. (Double tail) | ***0.003***** | 0.172 | 0.386 | 0.78 | 0.964 | 0.768 | ***0.035**** | ***0.023**** | 0.642 | 0.416 | ***0.030**** |
|  | HAMA total points | Correlation coefficient | .191 | 0.125 | 0.051 | *-0.039* | *0.07* | 0.487 | .163 | 0.237 | -0.115 | 0.290 | .209 |
|  |  | Sig. (Double tail) | ***0.002***** | 0.197 | 0.545 | 0.806 | 0.858 | 0.183 | ***0.025**** | ***0.013**** | 0.536 | 0.336 | ***0.040**** |
|  | Anxiety/somatization | Correlation coefficient | .199 | -0.006 | 0.093 | 0.1 | 0.084 | 0.566 | .210 | 0.164 | 0.053 | 0.556 | .245 |
|  |  | Sig. (Double tail) | ***0.002***** | 0.95 | 0.275 | 0.525 | 0.83 | 0.112 | ***0.004***** | 0.091 | 0.776 | ***0.048**** | ***0.016**** |
|  | Weight | Correlation coefficient | 0.093 | .205 | 0.07 | -0.055 | -0.163 | -0.516 | 0.094 | 0.040 | 0.029 | 0.168 | 0.181 |
|  |  | Sig. (Double tail) | 0.142 | ***0.033**** | 0.41 | 0.725 | 0.675 | 0.155 | 0.2 | 0.683 | 0.876 | 0.584 | 0.075 |
|  | Cognitive impairment | Correlation coefficient | .244 | 0.179 | 0.123 | 0.073 | 0.183 | -0.548 | .218 | 0.250 | 0.127 | 0.410 | .279 |
|  |  | Sig. (Double tail) | 0 | 0.063 | 0.145 | 0.643 | 0.638 | 0.127 | ***0.003***** | ***0.009***** | 0.496 | 0.164 | ***0.006***** |
|  | Day and night change | Correlation coefficient | 0.113 | 0.063 | .180 | -0.177 | 0.183 | -0.172 | 0.091 | 0.108 | -0.022 | 0.144 | 0.211 |
|  |  | Sig. (Double tail) | 0.074 | 0.516 | ***0.032**** | 0.255 | 0.638 | 0.659 | 0.212 | 0.264 | 0.907 | 0.639 | ***0.038**** |
|  | Blockage | Correlation coefficient | .227 | 0.131 | .174 | 0.107 | -0.274 | 0.16 | .225 | 0.230 | 0.063 | 0.307 | .303 |
|  |  | Sig. (Double tail) | 0 | 0.176 | ***0.039**** | 0.496 | 0.476 | 0.681 | ***0.002***** | ***0.017**** | 0.735 | 0.308 | ***0.003***** |
|  | Sleep disorder | Correlation coefficient | -0.018 | 0.065 | -0.006 | -0.039 | 0.203 | -0.171 | -0.068 | -0.083 | -0.068 | 0.091 | 0.057 |
|  |  | Sig. (Double tail) | 0.779 | 0.504 | 0.943 | 0.805 | 0.601 | 0.66 | 0.351 | 0.391 | 0.718 | 0.767 | 0.582 |
|  | Sense of Despair | Correlation coefficient | .214 | -0.025 | 0.124 | 0.293 | -0.479 | -0.06 | .224 | 0.194 | 0.086 | 0.453 | .252 |
|  |  | Sig. (Double tail) | ***0.001***** | 0.795 | 0.142 | 0.056 | 0.192 | 0.879 | ***0.002***** | ***0.044**** | 0.644 | 0.120 | ***0.013**** |
|  | HAMD total points | Correlation coefficient | .212 | 0.09 | 0.141 | 0.113 | -0.518 | -0.61 | .233 | 0.161 | 0.101 | 0.357 | .295 |
|  |  | Sig. (Double tail) | ***0.001***** | 0.353 | 0.095 | 0.471 | 0.154 | 0.081 | ***0.001***** | 0.096 | 0.587 | 0.231 | ***0.003***** |
|  | Somatization | Correlation coefficient | 0.032 | 0.041 | 0.042 | 0.24 | -0.547 | -0.052 | -0.006 | -0.008 | -0.144 | 0.485 | 0.141 |
|  |  | Sig. (Double tail) | 0.617 | 0.674 | 0.618 | 0.121 | 0.127 | 0.895 | 0.936 | 0.938 | 0.440 | 0.093 | 0.168 |
|  | Obsessive-compulsive | Correlation coefficient | 0.038 | 0.002 | -0.019 | 0.014 | -0.311 | -0.51 | 0.027 | 0.062 | -0.075 | 0.298 | 0.069 |
|  |  | Sig. (Double tail) | 0.554 | 0.988 | 0.822 | 0.927 | 0.415 | 0.16 | 0.712 | 0.523 | 0.689 | 0.322 | 0.499 |
|  | Interpersonal sensitivity | Correlation coefficient | 0.095 | 0.002 | 0.013 | 0.06 | -0.2 | -0.447 | 0.076 | 0.073 | 0.154 | 0.580 | 0.145 |
|  |  | Sig. (Double tail) | 0.133 | 0.983 | 0.882 | 0.703 | 0.606 | 0.227 | 0.298 | 0.451 | 0.408 | ***0.038**** | 0.155 |
|  | Depression | Correlation coefficient | 0.08 | 0.047 | 0.036 | 0.033 | -0.017 | -0.343 | 0.072 | 0.098 | 0.118 | 0.585 | 0.141 |
|  |  | Sig. (Double tail) | 0.21 | 0.627 | 0.669 | 0.835 | 0.966 | 0.366 | 0.329 | 0.313 | 0.529 | ***0.036**** | 0.168 |
|  | Anxiety | Correlation coefficient | 0.08 | -0.013 | 0.043 | 0.061 | 0.05 | -0.633 | 0.064 | 0.035 | 0.131 | 0.536 | 0.123 |
|  |  | Sig. (Double tail) | 0.211 | 0.891 | 0.613 | 0.699 | 0.898 | 0.067 | 0.381 | 0.721 | 0.483 | 0.059 | 0.231 |
|  | Hostility | Correlation coefficient | .150 | 0.045 | -0.024 | 0.094 | 0.092 | -0.483 | 0.126 | 0.130 | 0.128 | 0.557 | 0.138 |
|  |  | Sig. (Double tail) | ***0.018**** | 0.646 | 0.778 | 0.55 | 0.814 | 0.187 | 0.085 | 0.181 | 0.492 | ***0.048**** | 0.179 |
|  | Phobic anxiety | Correlation coefficient | 0.118 | -0.018 | 0.003 | 0.038 | 0 | -0.452 | 0.104 | 0.012 | 0.127 | 0.472 | 0.137 |
|  |  | Sig. (Double tail) | 0.063 | 0.852 | 0.971 | 0.811 | 1 | 0.222 | 0.157 | 0.899 | 0.496 | 0.104 | 0.182 |
|  | Paranoid ideation | Correlation coefficient | .148 | 0.042 | 0.004 | 0.064 | -0.017 | -0.427 | 0.128 | 0.102 | 0.128 | 0.453 | 0.138 |
|  |  | Sig. (Double tail) | ***0.019**** | 0.668 | 0.964 | 0.683 | 0.965 | 0.252 | 0.08 | 0.293 | 0.491 | 0.120 | 0.177 |
|  | Psychotics | Correlation coefficient | 0.104 | -0.019 | -0.013 | -0.007 | -0.017 | -0.3 | 0.097 | 0.032 | 0.130 | 0.453 | 0.133 |
|  |  | Sig. (Double tail) | 0.1 | 0.846 | 0.882 | 0.964 | 0.965 | 0.433 | 0.187 | 0.742 | 0.485 | 0.120 | 0.193 |
|  | Other symptoms | Correlation coefficient | 0.105 | -0.013 | 0.022 | 0.038 | -0.167 | -0.51 | 0.087 | -0.061 | 0.164 | 0.461 | 0.153 |
|  |  | Sig. (Double tail) | 0.098 | 0.89 | 0.792 | 0.811 | 0.667 | 0.16 | 0.235 | 0.533 | 0.379 | 0.113 | 0.134 |
|  | SCL-90 total points | Correlation coefficient | 0.102 | 0.018 | 0.017 | 0.101 | -0.017 | -0.577 | 0.083 | 0.072 | 0.086 | 0.523 | 0.138 |
|  |  | Sig. (Double tail) | 0.107 | 0.849 | 0.838 | 0.52 | 0.966 | 0.104 | 0.259 | 0.462 | 0.645 | 0.066 | 0.176 |
| NAOD-No anxiety or depression OA-Only anxiety OD-Only depression AAD-Anxiety and depression | | | | | | | | | | | | | |
| * At level 0.05 (two-tailed), the correlation was significant. | | | | | | | | | | | | | |
| ** At level 0.01 (two-tailed), the correlation was significant. | | | | | | | | | | | | | |
